# Supplementary material for: Bistable memory devices with lower threshold voltage by extending the molecular alkyl-chain length
Source: Royal Society of Chemistry journal article supplement (doi:10.1039/c3cp51290h), 2013-01-01
Supplement: c3cp51290h.pdf [file c3cp51290h.pdf]

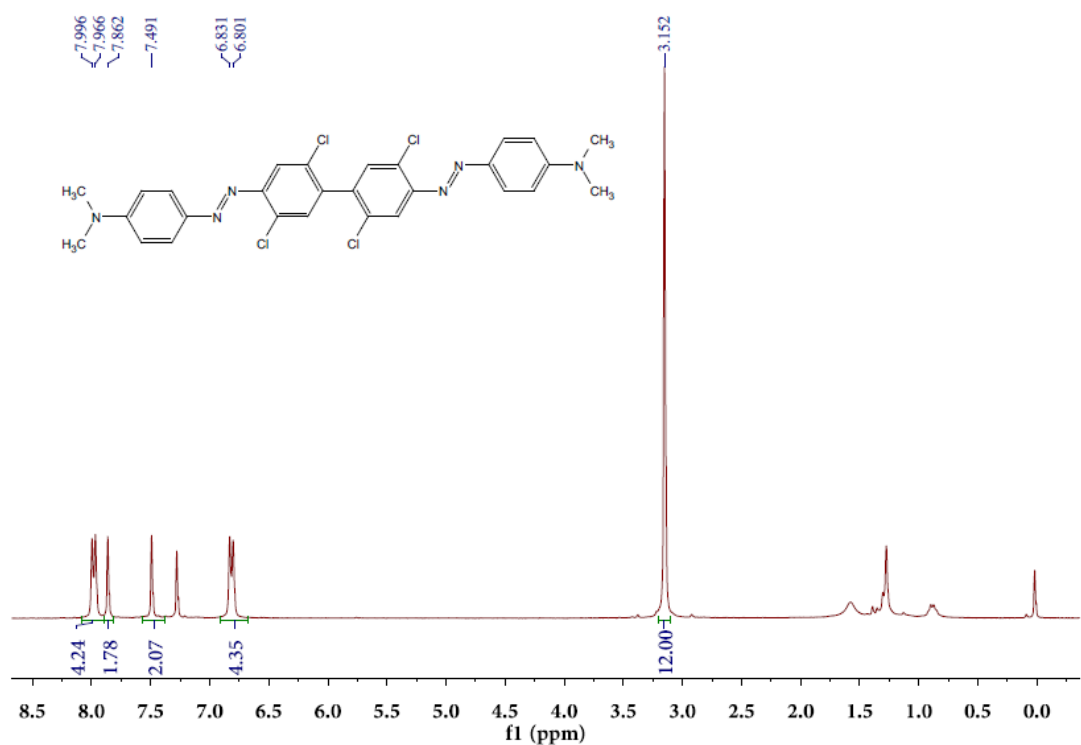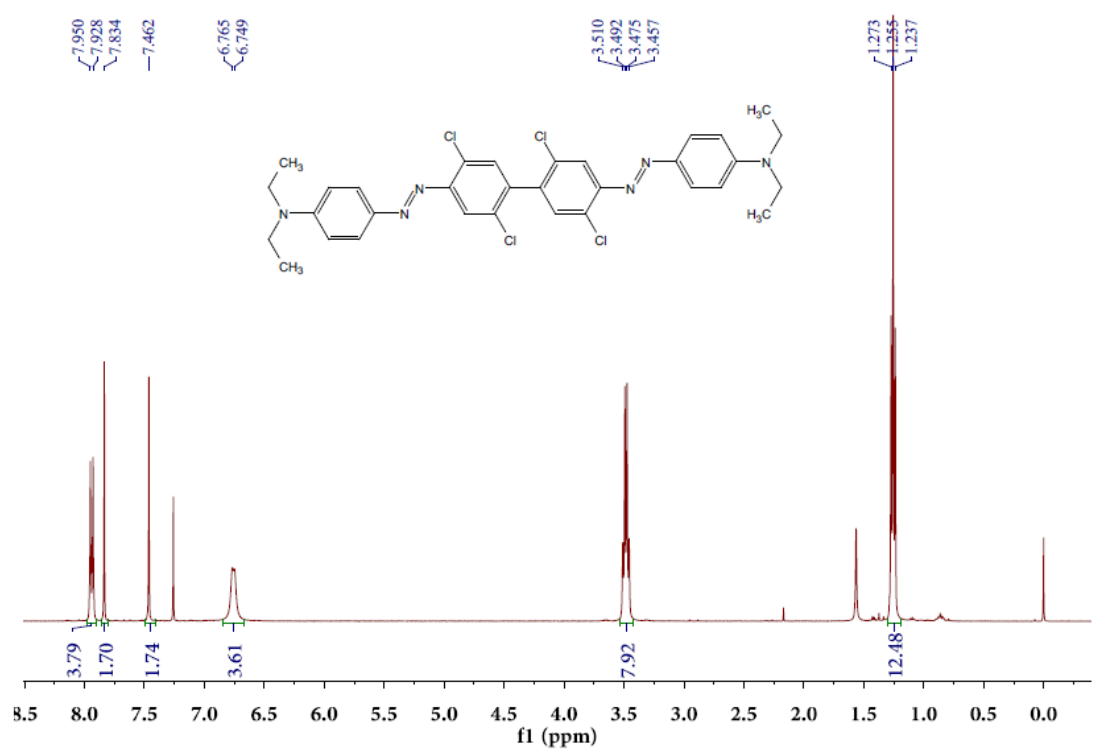

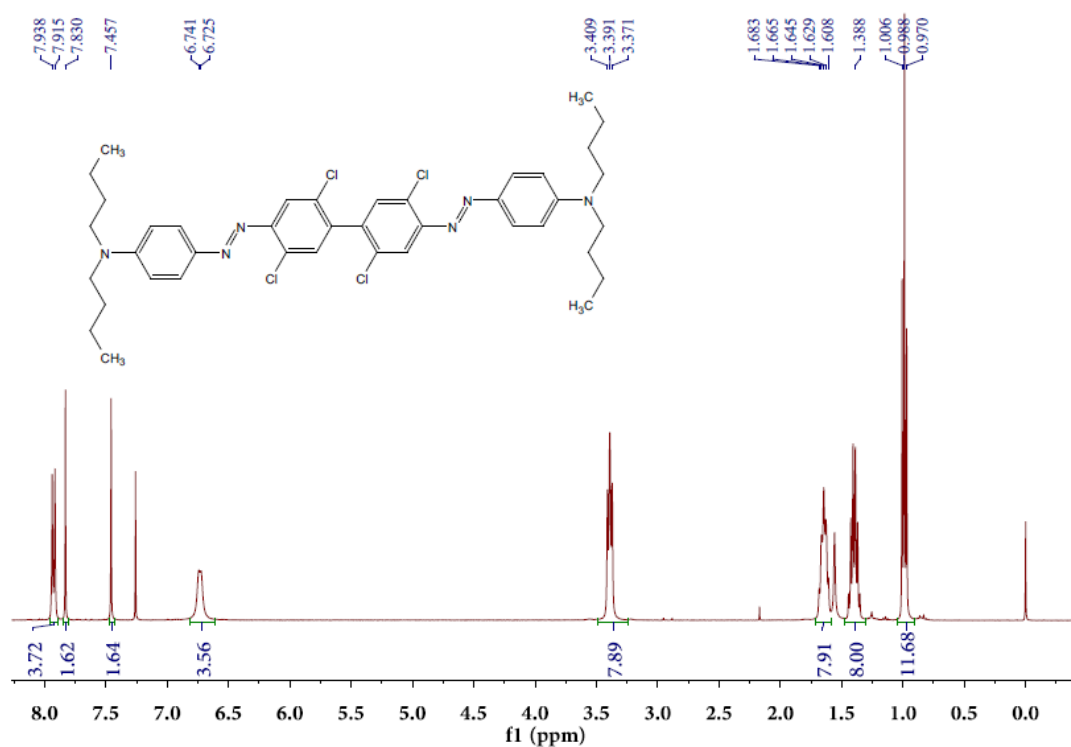

**Fig. S1** The  $^1\text{H}$ NMR spectra of Azo 1~3.

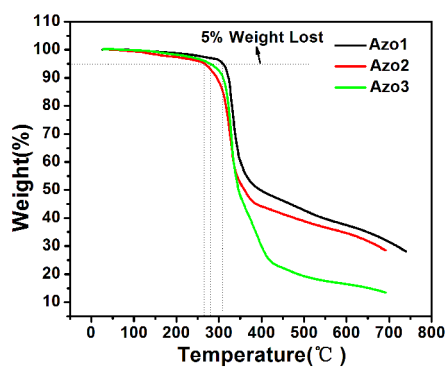

**Fig. S2** TGA curves of three Azos measured in nitrogen atmosphere at a heating rate of 10  $^{\circ}\text{C}/\text{min}$ .

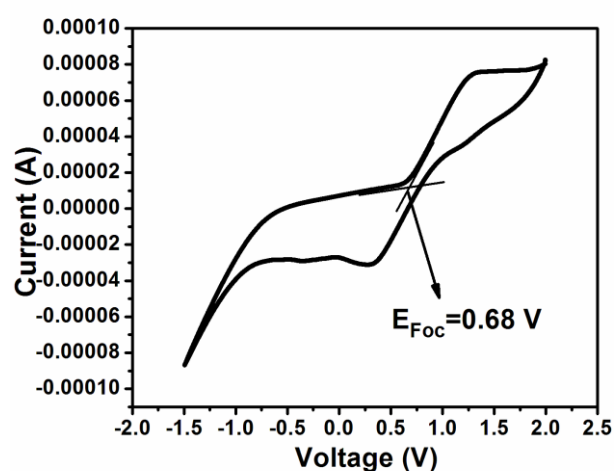

**Fig. S3** The cyclic voltammograms of ferrocene in deaerated  $\text{CH}_3\text{CN}$  containing  $\text{Bu}_4\text{NClO}_4$  (0.1 mol/L)

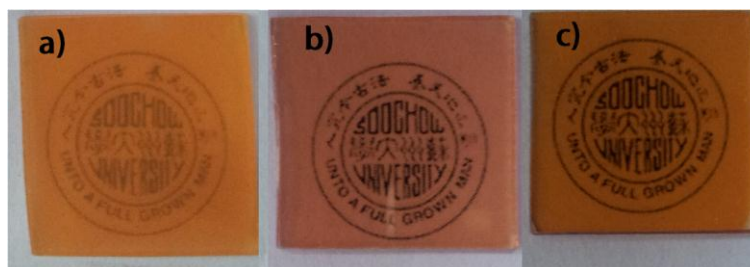

**Fig. S4** Optical images of three Azos thin films vacuum-deposited onto ITO substrate.

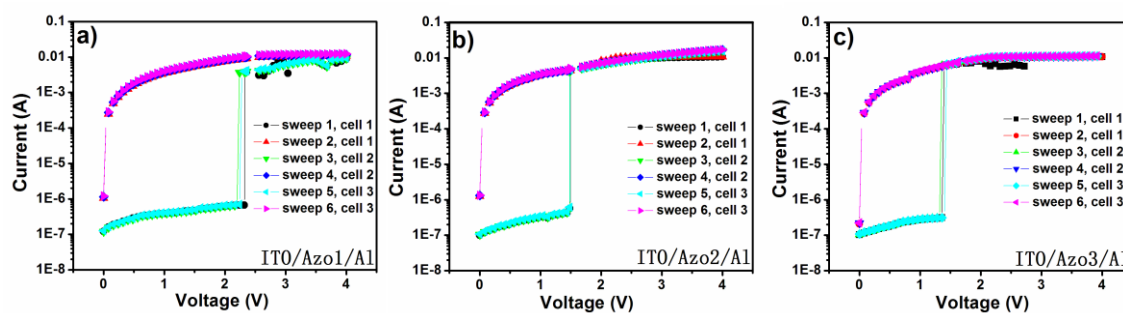

**Fig. S5** Current-voltage (I-V) curves of the three molecules-based memory devices under multiple voltage loops.

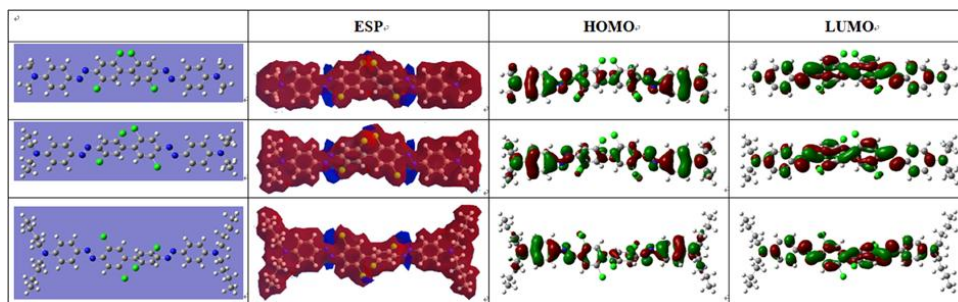

**Fig. S6** Molecular optimized conformation, ESP, HOMO and LUMO surfaces of the Azos.
